# Supplementary material
Source: Springer Nature journal article supplement (https://www.springermedizin.de/resource/supplementary/12916_2013_981_MOESM13_ESM.pdf/9598756)
Supplement: MOESM13 [file 9598756]

**Supplementary Table 12:** Biological pathways including genes that exhibit differential DNA methylation ( $P < 0.05$ ) after palmitate treatment in human pancreatic islets. Includes only pathways which also displayed enrichment for genes with differential expression after palmitate treatment in human pancreatic islets.

| Pathway<br>(total number of genes in the pathway)     | Observed<br>number of<br>genes                                                                                                                                                                                                                                                                                                                                                                                                                    | Expected<br>number of<br>genes | Ratio<br>Observed/<br>expected | Raw<br><i>P</i> -value | Adjusted<br><i>P</i> -value |
|-------------------------------------------------------|---------------------------------------------------------------------------------------------------------------------------------------------------------------------------------------------------------------------------------------------------------------------------------------------------------------------------------------------------------------------------------------------------------------------------------------------------|--------------------------------|--------------------------------|------------------------|-----------------------------|
| Pathways in cancer (326)                              | 63                                                                                                                                                                                                                                                                                                                                                                                                                                                | 16.61                          | 3.79                           | $5.09 \times 10^{-20}$ | $9.37 \times 10^{-18}$      |
| Adherens junction (73)                                | 28                                                                                                                                                                                                                                                                                                                                                                                                                                                | 3.72                           | 7.53                           | $6.96 \times 10^{-18}$ | $6.40 \times 10^{-16}$      |
| Regulation of actin cytoskeleton (213)                | 41                                                                                                                                                                                                                                                                                                                                                                                                                                                | 10.85                          | 3.78                           | $1.77 \times 10^{-13}$ | $1.09 \times 10^{-11}$      |
| Gap junction (90)                                     | 21                                                                                                                                                                                                                                                                                                                                                                                                                                                | 4.58                           | 4.58                           | $3.67 \times 10^{-09}$ | $6.75 \times 10^{-08}$      |
| Axon guidance (129)                                   | 25                                                                                                                                                                                                                                                                                                                                                                                                                                                | 6.57                           | 3.80                           | $7.55 \times 10^{-09}$ | $1.26 \times 10^{-07}$      |
| ECM-receptor interaction (85)                         | 18                                                                                                                                                                                                                                                                                                                                                                                                                                                | 4.33                           | 4.16                           | $2.28 \times 10^{-07}$ | $2.62 \times 10^{-06}$      |
| Metabolic pathways (1,130)                            | 97                                                                                                                                                                                                                                                                                                                                                                                                                                                | 57.57                          | 1.69                           | $4.36 \times 10^{-07}$ | $4.72 \times 10^{-06}$      |
| Insulin signaling pathway (138)                       | 19                                                                                                                                                                                                                                                                                                                                                                                                                                                | 7.03                           | 2.70                           | $7.74 \times 10^{-05}$ | 0.0003                      |
| Antigen processing and presentation (76)              | 12                                                                                                                                                                                                                                                                                                                                                                                                                                                | 3.87                           | 3.10                           | 0.0004                 | 0.0013                      |
| Notch signaling pathway (47)                          | 8                                                                                                                                                                                                                                                                                                                                                                                                                                                 | 2.39                           | 3.34                           | 0.0024                 | 0.0063                      |
| Ribosome (92)                                         | 12                                                                                                                                                                                                                                                                                                                                                                                                                                                | 4.69                           | 2.56                           | 0.0025                 | 0.0065                      |
| Cell cycle (124)                                      | 14                                                                                                                                                                                                                                                                                                                                                                                                                                                | 6.32                           | 2.22                           | 0.0044                 | 0.0105                      |
| ErbB signaling pathway (87)                           | 11                                                                                                                                                                                                                                                                                                                                                                                                                                                | 4.43                           | 2.48                           | 0.0046                 | 0.0107                      |
| PPAR signaling pathway (70)                           | 9                                                                                                                                                                                                                                                                                                                                                                                                                                                 | 3.57                           | 2.52                           | 0.0090                 | 0.0180                      |
| Pancreatic cancer (70)                                | 9                                                                                                                                                                                                                                                                                                                                                                                                                                                 | 3.57                           | 2.52                           | 0.0090                 | 0.0180                      |
| One carbon pool by folate (18)                        | 4                                                                                                                                                                                                                                                                                                                                                                                                                                                 | 0.92                           | 4.36                           | 0.0116                 | 0.0222                      |
| beta-Alanine metabolism (22)                          | 4                                                                                                                                                                                                                                                                                                                                                                                                                                                 | 1.12                           | 3.57                           | 0.0235                 | 0.0393                      |
| <b>Pathway (total number of genes in the pathway)</b> | <b>Observed genes</b>                                                                                                                                                                                                                                                                                                                                                                                                                             |                                |                                |                        |                             |
| Pathways in cancer                                    | <i>CDKN2B, GLI2, FNI, COL4A2, FOXO1, FGF13, EPAS1, CTNNA3, CTNNA1, ITGA6, RAC1, CTBP2, PRKCA, PDGFRA, TGFBR2, ETS1, GSTP1, FGF19, FZD6, CTNNA2, MECOM, DAPK2, CREBBP, RB1, CDC42, IGF1R, CTNNA1, PTEN, PIK3R2, CDKN1B, BCL2, COL4A1, ARNT2, MET, CASP8, RHOA, TPM3, LAMC1, DCC, PIK3R1, FGF12, MMP1, LAMA2, MAP2K2, EGFR, FZD7, TCF7L2, RXRB, GRB2, FGF1, PIAS3, TCF7L1, JAK1, WNT5B, MSH3, PML, WNT3, RUNX1, FZD5, TRAF5, ARNT, CTBP1, EGLN1</i> |                                |                                |                        |                             |
| Adherens junction                                     | <i>LMO7, WASF2, SORBS1, RHOA, CTNNA3, CTNNA1, SNAI1, RAC1, NLK, CSNK2A1, TJP1, TGFBR2, EGFR, CTNNA2, TCF7L2, CREBBP, PTPRF,</i>                                                                                                                                                                                                                                                                                                                   |                                |                                |                        |                             |

|                                     |                                                                                                                                                                                                                                                                                                                                                                                                                                                                                                                                                                                                                                                                                                                      |
|-------------------------------------|----------------------------------------------------------------------------------------------------------------------------------------------------------------------------------------------------------------------------------------------------------------------------------------------------------------------------------------------------------------------------------------------------------------------------------------------------------------------------------------------------------------------------------------------------------------------------------------------------------------------------------------------------------------------------------------------------------------------|
|                                     | <i>MLLT4, TCF7L1, FYN, PTPRJ, CDC42, PTPRB, CTNNA1, IGF1R, MET, VCL, PARD3</i>                                                                                                                                                                                                                                                                                                                                                                                                                                                                                                                                                                                                                                       |
| Regulation of actin cytoskeleton    | <i>WASF2, SSH2, PPP1R12A, FN1, FGF13, ITGA6, RAC1, MYH9, PDGFRA, MYH10, FGF19, PIP5K1C, IQGAP2, CDC42, PIK3R2, RDX, MYH14, ITGA9, VCL, CHRM3, LIMK2, CYFIP1, PDGFC, RHOA, PIK3R1, FGF12, MYL10, ARPC1A, MAP2K2, EGFR, ARPC3, FGF1, GNA12, ARHGEF6, CHRM5, ITGAD, PDGFD, GNA13, CHRM2, PIP5K1B, FGD1</i>                                                                                                                                                                                                                                                                                                                                                                                                              |
| Gap junction                        | <i>PDGFC, HTR2C, TJPI, TUBA1C, PRKCA, PDGFRA, MAP2K2, CDK1, EGFR, GRB2, LPAR1, ADCY5, ADCY2, ITPR1, ADRB1, PRKG1, PDGFD, TUBB2B, TUBB8, CSNK1D, ADCY7</i>                                                                                                                                                                                                                                                                                                                                                                                                                                                                                                                                                            |
| Axon guidance                       | <i>UNC5C, PPP3CA, LRRC4C, RHOA, DCC, RAC1, PLXNA2, EFNA3, ROBO1, SLIT3, SEMA6D, SEMA3E, PLXNB2, SEMA6A, CDK5, ABLIM1, FYN, CDC42, SEMA4A, NCK2, NTN4, MET, NTN1, LIMK2, UNC5D</i>                                                                                                                                                                                                                                                                                                                                                                                                                                                                                                                                    |
| ECM-receptor interaction            | <i>SV2B, FN1, COL4A2, LAMC1, COL11A2, ITGA6, TNXB, SDC2, RELN, LAMA2, CD36, COL3A1, GP5, VWF, GP6, COL4A1, CD44, ITGA9</i>                                                                                                                                                                                                                                                                                                                                                                                                                                                                                                                                                                                           |
| Metabolic pathways                  | <i>ARG2, PPT2, NDUFA5, ACACB, PCYT1B, AASS, LPCAT2, POLR1A, GALNT12, GALNT6, AGPAT1, PNLIPRP1, IDH2, TPO, EXT1, ST6GALNAC5, PIGL, CDS1, NDUFB3, FLAD1, ITPK1, ST3GAL4, GALNT9, PGAM4, DUT, ALDH1A3, GOT1, NDUFV3, HIBCH, GALNTL4, MGLL, MTHFD2L, ALLC, SEPHS1, TAT, GALNT5, SAT1, MTHFD1L, GALK2, HPSE2, PNLIPRP3, TPK1, AGPAT6, HLCS, AKR1D1, INPP4B, UQCRH, COX7B2, ITPKB, PIGN, PLCD3, PIP5K1C, CIGALT1, SMPD3, AMY2B, INPP5A, QDPR, FUT8, ALPL, CTPS2, PCK1, SHMT2, UGT1A8, STT3B, SYNJ2, GMDS, DBT, NOS3, HMGCR, NT5E, SMS, SUCLA2, GFPT1, GUK1, AK5, PRIM2, BPGM, GALC, UPBI, TRIT1, TBXAS1, CIGALTIC1, POLD3, SPTLC2, LIPC, GK2, PFKM, GCNT4, IDS, GAD2, ACSS3, GALNT2, PC, NME7, POLR1C, SPTLC3, PIP5K1B</i> |
| Insulin signaling pathway           | <i>ACACB, SORBS1, RHOQ, RAPGEF1, FOXO1, INPP5D, PIK3R1, PRKAR1B, MAP2K2, PDE3A, GRB2, PTPRF, IRS2, RPTOR, PIK3R2, PRKCZ, PCK1, RPS6, MKNK2</i>                                                                                                                                                                                                                                                                                                                                                                                                                                                                                                                                                                       |
| Antigen processing and presentation | <i>HSPA1L, IFNG, HLA-DPA1, CD8A, HLA-DQA2, HLA-DQA1, HLA-E, HLA-DMB, TAP2, HLA-C, HLA-DOB, HLA-DRB5</i>                                                                                                                                                                                                                                                                                                                                                                                                                                                                                                                                                                                                              |
| Notch signaling pathway             | <i>CREBBP, NCOR2, NOTCH4, CTBP2, MAML2, CTBP1, NCSTN, NUMB</i>                                                                                                                                                                                                                                                                                                                                                                                                                                                                                                                                                                                                                                                       |
| Ribosome                            | <i>RPL32, RPL17, RPL39, RPL14, RPS6, RPL30, RPL18A, RPL4, RPL24, RPS18, MRPL13, RPL23A</i>                                                                                                                                                                                                                                                                                                                                                                                                                                                                                                                                                                                                                           |
| Cell cycle                          | <i>CDKN2B, CREBBP, ANAPC5, RB1, CDC14B, PRKDC, TFDPI, MAD1L1, ATM, CDKN1B, YWHAQ, YWHAZ, CDK1, RAD21</i>                                                                                                                                                                                                                                                                                                                                                                                                                                                                                                                                                                                                             |

|                           |                                                                                   |
|---------------------------|-----------------------------------------------------------------------------------|
| ErbB signaling pathway    | <i>GRB2, ABL2, NRG3, PIK3R2, PIK3R1, NCK2, CDKN1B, PRKCA, ERBB4, MAP2K2, EGFR</i> |
| PPAR signaling pathway    | <i>SORBS1, PCK1, FABP2, MMP1, APOA5, CD36, GK2, PLTP, RXRB</i>                    |
| Pancreatic cancer         | <i>RBI, CDC42, JAK1, ARHGEF6, RAC1, PIK3R2, PIK3R1, TGFBR2, EGFR</i>              |
| One carbon pool by folate | <i>SHMT2, MTHFD1L, MTHFD2L, ALDH1L1</i>                                           |
| beta-Alanine metabolism   | <i>GAD2, HIBCH, UPBI, SMS</i>                                                     |
